# Supplementary material
Source: publisher figshare collection journal article supplement (https://acs.figshare.com/ndownloader/files/3730816)
Supplement: Supplementary file 1 [file 3730816]

 
data_m2 
 
_audit_creation_method            SHELXL-97 
_chemical_name_systematic 
; 
 ? 
; 
_chemical_name_common             ? 
_chemical_melting_point           ? 
_chemical_formula_moiety          
 'C82 H54 N4' 
_chemical_formula_sum 
 'C82 H54 N4' 
_chemical_formula_weight          1095.29 
 
loop_ 
 _atom_type_symbol 
 _atom_type_description 
 _atom_type_scat_dispersion_real 
 _atom_type_scat_dispersion_imag 
 _atom_type_scat_source 
 'C'  'C'   0.0033   0.0016 
 'International Tables Vol C Tables 4.2.6.8 and 6.1.1.4' 
 'H'  'H'   0.0000   0.0000 
 'International Tables Vol C Tables 4.2.6.8 and 6.1.1.4' 
 'N'  'N'   0.0061   0.0033 
 'International Tables Vol C Tables 4.2.6.8 and 6.1.1.4' 
 
_symmetry_cell_setting            triclinic 
_symmetry_space_group_name_H-M    'P -1'
_symmetry_space_group_name_Hall    '-P 1'
 
loop_ 
 _symmetry_equiv_pos_as_xyz 
 'x, y, z' 
 '-x, -y, -z' 
 
_cell_length_a                    10.1789(4) 
_cell_length_b                    11.9937(5) 
_cell_length_c                    13.2135(5) 
_cell_angle_alpha                 108.6000(10) 
_cell_angle_beta                  95.1890(10) 
_cell_angle_gamma                 102.3540(10) 
_cell_volume                      1471.38(10) 
_cell_formula_units_Z             1 
_cell_measurement_temperature     296(2) 
_cell_measurement_reflns_used     ? 
_cell_measurement_theta_min       ? 
_cell_measurement_theta_max       ? 
 
_exptl_crystal_description        block 
_exptl_crystal_colour             colorless
_exptl_crystal_size_max           0.13 
_exptl_crystal_size_mid           0.12 
_exptl_crystal_size_min           0.11 
_exptl_crystal_density_meas       ? 
_exptl_crystal_density_diffrn     1.236 
_exptl_crystal_density_method     'not measured' 
_exptl_crystal_F_000              574 
_exptl_absorpt_coefficient_mu     0.072 
_exptl_absorpt_correction_type    multi-scan
_exptl_absorpt_correction_T_min   0.9907 
_exptl_absorpt_correction_T_max   0.9922 
_exptl_absorpt_process_details    ? 
 
_exptl_special_details 
; 
 ? 
; 
 
_diffrn_ambient_temperature       296(2) 
_diffrn_radiation_wavelength      0.71073 
_diffrn_radiation_type            MoK\a 
_diffrn_radiation_source          'fine-focus sealed tube' 
_diffrn_radiation_monochromator   graphite 
_diffrn_measurement_device_type   'Rigaku RAXIS-RAPID' 
_diffrn_measurement_method        ? 
_diffrn_detector_area_resol_mean  ? 
_diffrn_standards_number          ? 
_diffrn_standards_interval_count  ? 
_diffrn_standards_interval_time   ? 
_diffrn_standards_decay_%         ? 
_diffrn_reflns_number             12741 
_diffrn_reflns_av_R_equivalents   0.0163 
_diffrn_reflns_av_sigmaI/netI     0.0308 
_diffrn_reflns_limit_h_min        -13 
_diffrn_reflns_limit_h_max        11 
_diffrn_reflns_limit_k_min        -11 
_diffrn_reflns_limit_k_max        16 
_diffrn_reflns_limit_l_min        -17 
_diffrn_reflns_limit_l_max        17 
_diffrn_reflns_theta_min          1.65 
_diffrn_reflns_theta_max          28.80 
_reflns_number_total              7563 
_reflns_number_gt                 5306 
_reflns_threshold_expression      >2sigma(I) 
 
_computing_data_collection        ? 
_computing_cell_refinement        ? 
_computing_data_reduction         ? 
_computing_structure_solution     'SHELXS-97 (Sheldrick, 1990)' 
_computing_structure_refinement   'SHELXL-97 (Sheldrick, 1997)' 
_computing_molecular_graphics     ? 
_computing_publication_material   ? 
 
_refine_special_details 
; 
 Refinement of F^2^ against ALL reflections.  The weighted R-factor wR and 
 goodness of fit S are based on F^2^, conventional R-factors R are based 
 on F, with F set to zero for negative F^2^. The threshold expression of 
 F^2^ > 2sigma(F^2^) is used only for calculating R-factors(gt) etc. and is 
 not relevant to the choice of reflections for refinement.  R-factors based 
 on F^2^ are statistically about twice as large as those based on F, and R- 
 factors based on ALL data will be even larger. 
; 
 
_refine_ls_structure_factor_coef  Fsqd  
_refine_ls_matrix_type            full 
_refine_ls_weighting_scheme       calc  
_refine_ls_weighting_details 
 'calc w=1/[\s^2^(Fo^2^)+(0.0725P)^2^+0.1707P] where P=(Fo^2^+2Fc^2^)/3' 
_atom_sites_solution_primary      direct 
_atom_sites_solution_secondary    difmap 
_atom_sites_solution_hydrogens    geom 
_refine_ls_hydrogen_treatment     constr
_refine_ls_extinction_method      none 
_refine_ls_extinction_coef        ? 
_refine_ls_number_reflns          7563 
_refine_ls_number_parameters      388 
_refine_ls_number_restraints      0 
_refine_ls_R_factor_all           0.0723 
_refine_ls_R_factor_gt            0.0480 
_refine_ls_wR_factor_ref          0.1416 
_refine_ls_wR_factor_gt           0.1244 
_refine_ls_goodness_of_fit_ref    1.018 
_refine_ls_restrained_S_all       1.018 
_refine_ls_shift/su_max           0.019 
_refine_ls_shift/su_mean          0.003 
 
loop_ 
 _atom_site_label 
 _atom_site_type_symbol 
 _atom_site_fract_x 
 _atom_site_fract_y 
 _atom_site_fract_z 
 _atom_site_U_iso_or_equiv 
 _atom_site_adp_type 
 _atom_site_occupancy 
 _atom_site_symmetry_multiplicity 
 _atom_site_calc_flag 
 _atom_site_refinement_flags 
 _atom_site_disorder_assembly 
 _atom_site_disorder_group 
C1 C 0.73791(18) 0.31631(16) 0.24925(14) 0.0599(4) Uani 1 1 d . . . 
H1 H 0.7272 0.3264 0.3205 0.072 Uiso 1 1 calc R . . 
C2 C 0.8594(2) 0.3734(2) 0.22841(19) 0.0816(6) Uani 1 1 d . . . 
H2 H 0.9286 0.4239 0.2858 0.098 Uiso 1 1 calc R . . 
C3 C 0.8795(2) 0.35666(19) 0.1239(2) 0.0753(6) Uani 1 1 d . . . 
H3 H 0.9623 0.3942 0.1101 0.090 Uiso 1 1 calc R . . 
C4 C 0.7764(2) 0.28418(18) 0.04014(17) 0.0656(5) Uani 1 1 d . . . 
H4 H 0.7894 0.2720 -0.0310 0.079 Uiso 1 1 calc R . . 
C5 C 0.65231(18) 0.22855(14) 0.06056(13) 0.0504(4) Uani 1 1 d . . . 
H5 H 0.5824 0.1804 0.0029 0.060 Uiso 1 1 calc R . . 
C6 C 0.63148(15) 0.24407(11) 0.16573(11) 0.0381(3) Uani 1 1 d . . . 
C7 C 0.49842(14) 0.18364(11) 0.18807(10) 0.0365(3) Uani 1 1 d . . . 
C8 C 0.38114(15) 0.21115(12) 0.16172(11) 0.0399(3) Uani 1 1 d . . . 
C9 C 0.37784(16) 0.31610(13) 0.12453(12) 0.0451(3) Uani 1 1 d . . . 
C10 C 0.4583(2) 0.43177(14) 0.18342(13) 0.0580(4) Uani 1 1 d . . . 
H10 H 0.5179 0.4443 0.2460 0.070 Uiso 1 1 calc R . . 
C11 C 0.4512(3) 0.52911(17) 0.15045(17) 0.0775(6) Uani 1 1 d . . . 
H11 H 0.5062 0.6064 0.1908 0.093 Uiso 1 1 calc R . . 
C12 C 0.3648(3) 0.5125(2) 0.0598(2) 0.0903(8) Uani 1 1 d . . . 
H12 H 0.3610 0.5782 0.0376 0.108 Uiso 1 1 calc R . . 
C13 C 0.2828(3) 0.3990(3) 0.0007(2) 0.1004(9) Uani 1 1 d . . . 
H13 H 0.2228 0.3880 -0.0612 0.121 Uiso 1 1 calc R . . 
C14 C 0.2889(2) 0.3006(2) 0.03280(18) 0.0772(6) Uani 1 1 d . . . 
H14 H 0.2328 0.2238 -0.0076 0.093 Uiso 1 1 calc R . . 
C15 C 0.24329(15) 0.14061(13) 0.16671(12) 0.0437(3) Uani 1 1 d . . . 
C16 C 0.15727(19) 0.19832(17) 0.22748(16) 0.0630(5) Uani 1 1 d . . . 
H16 H 0.1855 0.2817 0.2654 0.076 Uiso 1 1 calc R . . 
C17 C 0.0302(2) 0.1332(2) 0.23226(19) 0.0769(6) Uani 1 1 d . . . 
H17 H -0.0254 0.1725 0.2751 0.092 Uiso 1 1 calc R . . 
C18 C -0.0146(2) 0.0113(2) 0.17457(19) 0.0756(6) Uani 1 1 d . . . 
H18 H -0.1005 -0.0322 0.1780 0.091 Uiso 1 1 calc R . . 
C19 C 0.06739(19) -0.04636(18) 0.11171(18) 0.0700(5) Uani 1 1 d . . . 
H19 H 0.0365 -0.1290 0.0714 0.084 Uiso 1 1 calc R . . 
C20 C 0.19571(17) 0.01744(15) 0.10777(14) 0.0548(4) Uani 1 1 d . . . 
H20 H 0.2508 -0.0228 0.0650 0.066 Uiso 1 1 calc R . . 
C21 C 0.50383(14) 0.09041(11) 0.23998(11) 0.0346(3) Uani 1 1 d . . . 
C22 C 0.58353(15) 0.00799(12) 0.20798(12) 0.0416(3) Uani 1 1 d . . . 
H22 H 0.6379 0.0139 0.1560 0.050 Uiso 1 1 calc R . . 
C23 C 0.58303(14) -0.08259(12) 0.25243(12) 0.0403(3) Uani 1 1 d . . . 
H23 H 0.6359 -0.1372 0.2293 0.048 Uiso 1 1 calc R . . 
C24 C 0.50364(13) -0.09206(11) 0.33154(10) 0.0335(3) Uani 1 1 d . . . 
C25 C 0.42974(14) -0.00627(11) 0.36757(10) 0.0358(3) Uani 1 1 d . . . 
H25 H 0.3794 -0.0093 0.4224 0.043 Uiso 1 1 calc R . . 
C26 C 0.43031(14) 0.08355(11) 0.32277(11) 0.0369(3) Uani 1 1 d . . . 
H26 H 0.3807 0.1404 0.3484 0.044 Uiso 1 1 calc R . . 
C27 C 0.50341(13) -0.19097(11) 0.37579(10) 0.0324(3) Uani 1 1 d . . . 
C28 C 0.25214(14) -0.23976(12) 0.38154(12) 0.0401(3) Uani 1 1 d . . . 
C29 C 0.17558(18) -0.2831(2) 0.27935(16) 0.0691(5) Uani 1 1 d . . . 
H29 H 0.2073 -0.3282 0.2199 0.083 Uiso 1 1 calc R . . 
C30 C 0.0491(2) -0.2575(3) 0.2674(3) 0.1073(10) Uani 1 1 d . . . 
H30 H -0.0039 -0.2853 0.1988 0.129 Uiso 1 1 calc R . . 
C31 C 0.0020(2) -0.1925(3) 0.3545(3) 0.1108(11) Uani 1 1 d . . . 
H31 H -0.0825 -0.1760 0.3449 0.133 Uiso 1 1 calc R . . 
C32 C 0.0783(2) -0.15102(19) 0.4561(3) 0.0871(8) Uani 1 1 d . . . 
H32 H 0.0455 -0.1068 0.5154 0.105 Uiso 1 1 calc R . . 
C33 C 0.20453(17) -0.17518(14) 0.47055(16) 0.0561(4) Uani 1 1 d . . . 
H33 H 0.2565 -0.1481 0.5395 0.067 Uiso 1 1 calc R . . 
C34 C 0.42583(12) -0.34492(10) 0.43198(10) 0.0296(3) Uani 1 1 d . . . 
C35 C 0.56443(12) -0.32197(10) 0.43469(10) 0.0308(3) Uani 1 1 d . . . 
C36 C 0.64414(12) -0.39070(10) 0.47251(10) 0.0295(3) Uani 1 1 d . . . 
C37 C 0.78528(13) -0.36368(12) 0.48081(12) 0.0379(3) Uani 1 1 d . . . 
H37 H 0.8303 -0.3008 0.4597 0.046 Uiso 1 1 calc R . . 
C38 C 0.85874(13) -0.42952(12) 0.52011(12) 0.0404(3) Uani 1 1 d . . . 
H38 H 0.9534 -0.4094 0.5269 0.049 Uiso 1 1 calc R . . 
C39 C 0.79370(13) -0.52511(11) 0.54954(11) 0.0355(3) Uani 1 1 d . . . 
H39 H 0.8450 -0.5688 0.5756 0.043 Uiso 1 1 calc R . . 
C40 C 0.65160(12) -0.55696(10) 0.54057(10) 0.0290(2) Uani 1 1 d . . . 
C41 C 0.57313(11) -0.48715(10) 0.50343(9) 0.0274(2) Uani 1 1 d . . . 
N1 N 0.61243(11) -0.22693(9) 0.39887(9) 0.0342(2) Uani 1 1 d . . . 
N2 N 0.38585(11) -0.25896(9) 0.39483(9) 0.0326(2) Uani 1 1 d . . . 
 
loop_ 
 _atom_site_aniso_label 
 _atom_site_aniso_U_11 
 _atom_site_aniso_U_22 
 _atom_site_aniso_U_33 
 _atom_site_aniso_U_23 
 _atom_site_aniso_U_13 
 _atom_site_aniso_U_12 
C1 0.0549(10) 0.0663(11) 0.0552(9) 0.0276(8) 0.0036(8) 0.0015(8) 
C2 0.0549(12) 0.0869(15) 0.0934(15) 0.0393(12) 0.0001(10) -0.0083(10) 
C3 0.0577(12) 0.0763(13) 0.1127(17) 0.0585(13) 0.0297(12) 0.0146(10) 
C4 0.0792(14) 0.0739(12) 0.0774(12) 0.0519(10) 0.0425(11) 0.0376(10) 
C5 0.0618(10) 0.0489(8) 0.0506(8) 0.0254(7) 0.0151(7) 0.0208(7) 
C6 0.0454(8) 0.0332(6) 0.0453(7) 0.0238(6) 0.0092(6) 0.0136(5) 
C7 0.0455(8) 0.0301(6) 0.0396(7) 0.0187(5) 0.0075(6) 0.0115(5) 
C8 0.0473(8) 0.0357(7) 0.0431(7) 0.0200(6) 0.0071(6) 0.0146(6) 
C9 0.0504(9) 0.0469(8) 0.0538(8) 0.0306(7) 0.0127(7) 0.0233(6) 
C10 0.0937(14) 0.0399(8) 0.0508(9) 0.0213(7) 0.0171(9) 0.0280(8) 
C11 0.1292(19) 0.0468(10) 0.0802(13) 0.0355(9) 0.0390(13) 0.0423(11) 
C12 0.113(2) 0.0949(17) 0.1209(19) 0.0842(16) 0.0464(16) 0.0633(15) 
C13 0.0811(16) 0.134(2) 0.127(2) 0.101(2) -0.0028(14) 0.0333(15) 
C14 0.0630(12) 0.0883(14) 0.0921(14) 0.0600(12) -0.0114(10) 0.0101(10) 
C15 0.0436(8) 0.0431(8) 0.0515(8) 0.0242(6) 0.0055(6) 0.0154(6) 
C16 0.0629(12) 0.0524(10) 0.0802(12) 0.0232(9) 0.0257(9) 0.0225(8) 
C17 0.0630(13) 0.0793(14) 0.1039(16) 0.0372(12) 0.0395(11) 0.0316(10) 
C18 0.0471(11) 0.0786(14) 0.1078(16) 0.0435(12) 0.0181(11) 0.0108(9) 
C19 0.0515(11) 0.0567(10) 0.0929(14) 0.0215(10) 0.0065(10) 0.0054(8) 
C20 0.0467(9) 0.0481(9) 0.0670(10) 0.0167(8) 0.0074(8) 0.0127(7) 
C21 0.0376(7) 0.0302(6) 0.0411(7) 0.0199(5) 0.0050(5) 0.0088(5) 
C22 0.0457(8) 0.0411(7) 0.0530(8) 0.0300(6) 0.0191(6) 0.0170(6) 
C23 0.0415(8) 0.0375(7) 0.0561(8) 0.0278(6) 0.0168(6) 0.0183(6) 
C24 0.0335(7) 0.0298(6) 0.0427(7) 0.0207(5) 0.0048(5) 0.0080(5) 
C25 0.0398(7) 0.0333(6) 0.0400(7) 0.0196(5) 0.0094(5) 0.0096(5) 
C26 0.0413(8) 0.0316(6) 0.0447(7) 0.0187(5) 0.0092(6) 0.0141(5) 
C27 0.0323(7) 0.0291(6) 0.0412(7) 0.0190(5) 0.0082(5) 0.0081(5) 
C28 0.0297(7) 0.0382(7) 0.0659(9) 0.0350(7) 0.0083(6) 0.0106(5) 
C29 0.0443(10) 0.0989(14) 0.0742(12) 0.0531(11) -0.0019(8) 0.0091(9) 
C30 0.0436(12) 0.181(3) 0.134(2) 0.117(2) -0.0024(13) 0.0174(15) 
C31 0.0431(12) 0.156(2) 0.212(3) 0.152(3) 0.0410(17) 0.0432(14) 
C32 0.0594(13) 0.0732(13) 0.174(3) 0.0787(15) 0.0640(15) 0.0369(10) 
C33 0.0447(9) 0.0444(8) 0.0912(12) 0.0321(8) 0.0281(8) 0.0162(7) 
C34 0.0285(6) 0.0291(6) 0.0377(6) 0.0183(5) 0.0063(5) 0.0101(4) 
C35 0.0301(6) 0.0281(6) 0.0405(6) 0.0192(5) 0.0084(5) 0.0081(5) 
C36 0.0273(6) 0.0279(6) 0.0391(6) 0.0180(5) 0.0086(5) 0.0084(4) 
C37 0.0287(7) 0.0350(7) 0.0601(8) 0.0285(6) 0.0136(6) 0.0078(5) 
C38 0.0238(6) 0.0406(7) 0.0648(9) 0.0276(6) 0.0112(6) 0.0089(5) 
C39 0.0267(6) 0.0351(6) 0.0531(8) 0.0243(6) 0.0072(5) 0.0113(5) 
C40 0.0269(6) 0.0277(6) 0.0375(6) 0.0169(5) 0.0076(5) 0.0082(4) 
C41 0.0240(6) 0.0277(6) 0.0350(6) 0.0158(5) 0.0074(4) 0.0075(4) 
N1 0.0334(6) 0.0304(5) 0.0471(6) 0.0234(5) 0.0104(5) 0.0088(4) 
N2 0.0295(6) 0.0312(5) 0.0454(6) 0.0230(5) 0.0068(4) 0.0099(4) 
 
_geom_special_details 
; 
 All esds (except the esd in the dihedral angle between two l.s. planes) 
 are estimated using the full covariance matrix.  The cell esds are taken 
 into account individually in the estimation of esds in distances, angles 
 and torsion angles; correlations between esds in cell parameters are only 
 used when they are defined by crystal symmetry.  An approximate (isotropic) 
 treatment of cell esds is used for estimating esds involving l.s. planes. 
; 
 
loop_ 
 _geom_bond_atom_site_label_1 
 _geom_bond_atom_site_label_2 
 _geom_bond_distance 
 _geom_bond_site_symmetry_2 
 _geom_bond_publ_flag 
C1 C2 1.377(3) . ? 
C1 C6 1.384(2) . ? 
C1 H1 0.9300 . ? 
C2 C3 1.372(3) . ? 
C2 H2 0.9300 . ? 
C3 C4 1.366(3) . ? 
C3 H3 0.9300 . ? 
C4 C5 1.389(2) . ? 
C4 H4 0.9300 . ? 
C5 C6 1.384(2) . ? 
C5 H5 0.9300 . ? 
C6 C7 1.4952(19) . ? 
C7 C8 1.3497(19) . ? 
C7 C21 1.4942(16) . ? 
C8 C9 1.4956(18) . ? 
C8 C15 1.494(2) . ? 
C9 C10 1.382(2) . ? 
C9 C14 1.382(2) . ? 
C10 C11 1.383(2) . ? 
C10 H10 0.9300 . ? 
C11 C12 1.353(3) . ? 
C11 H11 0.9300 . ? 
C12 C13 1.370(4) . ? 
C12 H12 0.9300 . ? 
C13 C14 1.387(3) . ? 
C13 H13 0.9300 . ? 
C14 H14 0.9300 . ? 
C15 C20 1.384(2) . ? 
C15 C16 1.386(2) . ? 
C16 C17 1.379(3) . ? 
C16 H16 0.9300 . ? 
C17 C18 1.367(3) . ? 
C17 H17 0.9300 . ? 
C18 C19 1.368(3) . ? 
C18 H18 0.9300 . ? 
C19 C20 1.380(2) . ? 
C19 H19 0.9300 . ? 
C20 H20 0.9300 . ? 
C21 C26 1.3937(19) . ? 
C21 C22 1.3974(19) . ? 
C22 C23 1.3893(17) . ? 
C22 H22 0.9300 . ? 
C23 C24 1.3956(19) . ? 
C23 H23 0.9300 . ? 
C24 C25 1.3910(18) . ? 
C24 C27 1.4801(16) . ? 
C25 C26 1.3842(17) . ? 
C25 H25 0.9300 . ? 
C26 H26 0.9300 . ? 
C27 N1 1.3183(16) . ? 
C27 N2 1.3885(15) . ? 
C28 C29 1.374(2) . ? 
C28 C33 1.379(2) . ? 
C28 N2 1.4328(17) . ? 
C29 C30 1.392(3) . ? 
C29 H29 0.9300 . ? 
C30 C31 1.360(4) . ? 
C30 H30 0.9300 . ? 
C31 C32 1.369(4) . ? 
C31 H31 0.9300 . ? 
C32 C33 1.386(3) . ? 
C32 H32 0.9300 . ? 
C33 H33 0.9300 . ? 
C34 C35 1.3733(17) . ? 
C34 N2 1.3913(14) . ? 
C34 C40 1.4370(15) 2_646 ? 
C35 N1 1.3820(14) . ? 
C35 C36 1.4364(16) . ? 
C36 C37 1.3894(17) . ? 
C36 C41 1.4229(15) . ? 
C37 C38 1.3771(18) . ? 
C37 H37 0.9300 . ? 
C38 C39 1.3821(17) . ? 
C38 H38 0.9300 . ? 
C39 C40 1.3984(17) . ? 
C39 H39 0.9300 . ? 
C40 C41 1.4344(16) . ? 
C40 C34 1.4370(15) 2_646 ? 
C41 C41 1.442(2) 2_646 ? 
 
loop_ 
 _geom_angle_atom_site_label_1 
 _geom_angle_atom_site_label_2 
 _geom_angle_atom_site_label_3 
 _geom_angle 
 _geom_angle_site_symmetry_1 
 _geom_angle_site_symmetry_3 
 _geom_angle_publ_flag 
C2 C1 C6 120.98(17) . . ? 
C2 C1 H1 119.5 . . ? 
C6 C1 H1 119.5 . . ? 
C3 C2 C1 120.63(19) . . ? 
C3 C2 H2 119.7 . . ? 
C1 C2 H2 119.7 . . ? 
C4 C3 C2 119.30(18) . . ? 
C4 C3 H3 120.3 . . ? 
C2 C3 H3 120.3 . . ? 
C3 C4 C5 120.41(17) . . ? 
C3 C4 H4 119.8 . . ? 
C5 C4 H4 119.8 . . ? 
C6 C5 C4 120.73(16) . . ? 
C6 C5 H5 119.6 . . ? 
C4 C5 H5 119.6 . . ? 
C5 C6 C1 117.92(14) . . ? 
C5 C6 C7 120.91(13) . . ? 
C1 C6 C7 121.17(13) . . ? 
C8 C7 C21 122.49(12) . . ? 
C8 C7 C6 121.79(11) . . ? 
C21 C7 C6 115.71(11) . . ? 
C7 C8 C9 122.60(13) . . ? 
C7 C8 C15 123.66(12) . . ? 
C9 C8 C15 113.73(12) . . ? 
C10 C9 C14 118.29(15) . . ? 
C10 C9 C8 121.16(13) . . ? 
C14 C9 C8 120.48(15) . . ? 
C9 C10 C11 120.80(18) . . ? 
C9 C10 H10 119.6 . . ? 
C11 C10 H10 119.6 . . ? 
C12 C11 C10 120.4(2) . . ? 
C12 C11 H11 119.8 . . ? 
C10 C11 H11 119.8 . . ? 
C11 C12 C13 119.96(18) . . ? 
C11 C12 H12 120.0 . . ? 
C13 C12 H12 120.0 . . ? 
C12 C13 C14 120.3(2) . . ? 
C12 C13 H13 119.9 . . ? 
C14 C13 H13 119.9 . . ? 
C9 C14 C13 120.3(2) . . ? 
C9 C14 H14 119.9 . . ? 
C13 C14 H14 119.9 . . ? 
C20 C15 C16 118.15(15) . . ? 
C20 C15 C8 121.21(14) . . ? 
C16 C15 C8 120.59(14) . . ? 
C17 C16 C15 120.59(17) . . ? 
C17 C16 H16 119.7 . . ? 
C15 C16 H16 119.7 . . ? 
C18 C17 C16 120.50(19) . . ? 
C18 C17 H17 119.7 . . ? 
C16 C17 H17 119.7 . . ? 
C17 C18 C19 119.64(18) . . ? 
C17 C18 H18 120.2 . . ? 
C19 C18 H18 120.2 . . ? 
C18 C19 C20 120.37(18) . . ? 
C18 C19 H19 119.8 . . ? 
C20 C19 H19 119.8 . . ? 
C19 C20 C15 120.70(17) . . ? 
C19 C20 H20 119.7 . . ? 
C15 C20 H20 119.7 . . ? 
C26 C21 C22 117.77(11) . . ? 
C26 C21 C7 120.99(12) . . ? 
C22 C21 C7 121.24(12) . . ? 
C23 C22 C21 121.15(13) . . ? 
C23 C22 H22 119.4 . . ? 
C21 C22 H22 119.4 . . ? 
C22 C23 C24 120.37(13) . . ? 
C22 C23 H23 119.8 . . ? 
C24 C23 H23 119.8 . . ? 
C25 C24 C23 118.57(11) . . ? 
C25 C24 C27 122.38(11) . . ? 
C23 C24 C27 119.03(12) . . ? 
C26 C25 C24 120.75(12) . . ? 
C26 C25 H25 119.6 . . ? 
C24 C25 H25 119.6 . . ? 
C25 C26 C21 121.22(12) . . ? 
C25 C26 H26 119.4 . . ? 
C21 C26 H26 119.4 . . ? 
N1 C27 N2 112.30(10) . . ? 
N1 C27 C24 124.52(11) . . ? 
N2 C27 C24 123.15(11) . . ? 
C29 C28 C33 121.33(16) . . ? 
C29 C28 N2 119.07(15) . . ? 
C33 C28 N2 119.57(14) . . ? 
C28 C29 C30 118.2(2) . . ? 
C28 C29 H29 120.9 . . ? 
C30 C29 H29 120.9 . . ? 
C31 C30 C29 121.0(2) . . ? 
C31 C30 H30 119.5 . . ? 
C29 C30 H30 119.5 . . ? 
C30 C31 C32 120.4(2) . . ? 
C30 C31 H31 119.8 . . ? 
C32 C31 H31 119.8 . . ? 
C31 C32 C33 119.9(2) . . ? 
C31 C32 H32 120.1 . . ? 
C33 C32 H32 120.1 . . ? 
C28 C33 C32 119.2(2) . . ? 
C28 C33 H33 120.4 . . ? 
C32 C33 H33 120.4 . . ? 
C35 C34 N2 105.17(10) . . ? 
C35 C34 C40 123.30(10) . 2_646 ? 
N2 C34 C40 131.49(11) . 2_646 ? 
C34 C35 N1 111.66(10) . . ? 
C34 C35 C36 121.68(10) . . ? 
N1 C35 C36 126.65(11) . . ? 
C37 C36 C41 120.74(11) . . ? 
C37 C36 C35 121.90(11) . . ? 
C41 C36 C35 117.35(10) . . ? 
C38 C37 C36 120.29(11) . . ? 
C38 C37 H37 119.9 . . ? 
C36 C37 H37 119.9 . . ? 
C37 C38 C39 120.86(12) . . ? 
C37 C38 H38 119.6 . . ? 
C39 C38 H38 119.6 . . ? 
C38 C39 C40 120.76(11) . . ? 
C38 C39 H39 119.6 . . ? 
C40 C39 H39 119.6 . . ? 
C39 C40 C41 119.46(10) . . ? 
C39 C40 C34 125.14(11) . 2_646 ? 
C41 C40 C34 115.38(10) . 2_646 ? 
C36 C41 C40 117.82(10) . . ? 
C36 C41 C41 120.29(13) . 2_646 ? 
C40 C41 C41 121.89(12) . 2_646 ? 
C27 N1 C35 104.66(10) . . ? 
C27 N2 C34 106.19(10) . . ? 
C27 N2 C28 125.88(10) . . ? 
C34 N2 C28 127.91(10) . . ? 
 
loop_ 
 _geom_torsion_atom_site_label_1 
 _geom_torsion_atom_site_label_2 
 _geom_torsion_atom_site_label_3 
 _geom_torsion_atom_site_label_4 
 _geom_torsion 
 _geom_torsion_site_symmetry_1 
 _geom_torsion_site_symmetry_2 
 _geom_torsion_site_symmetry_3 
 _geom_torsion_site_symmetry_4 
 _geom_torsion_publ_flag 
C6 C1 C2 C3 -2.2(3) . . . . ? 
C1 C2 C3 C4 1.2(3) . . . . ? 
C2 C3 C4 C5 0.3(3) . . . . ? 
C3 C4 C5 C6 -0.9(3) . . . . ? 
C4 C5 C6 C1 -0.1(2) . . . . ? 
C4 C5 C6 C7 -179.56(13) . . . . ? 
C2 C1 C6 C5 1.6(3) . . . . ? 
C2 C1 C6 C7 -178.88(17) . . . . ? 
C5 C6 C7 C8 -64.12(18) . . . . ? 
C1 C6 C7 C8 116.41(17) . . . . ? 
C5 C6 C7 C21 115.21(14) . . . . ? 
C1 C6 C7 C21 -64.26(18) . . . . ? 
C21 C7 C8 C9 171.06(12) . . . . ? 
C6 C7 C8 C9 -9.7(2) . . . . ? 
C21 C7 C8 C15 -9.0(2) . . . . ? 
C6 C7 C8 C15 170.33(13) . . . . ? 
C7 C8 C9 C10 -51.8(2) . . . . ? 
C15 C8 C9 C10 128.25(16) . . . . ? 
C7 C8 C9 C14 131.42(18) . . . . ? 
C15 C8 C9 C14 -48.6(2) . . . . ? 
C14 C9 C10 C11 -0.9(3) . . . . ? 
C8 C9 C10 C11 -177.77(17) . . . . ? 
C9 C10 C11 C12 0.2(3) . . . . ? 
C10 C11 C12 C13 0.6(4) . . . . ? 
C11 C12 C13 C14 -0.6(4) . . . . ? 
C10 C9 C14 C13 0.9(3) . . . . ? 
C8 C9 C14 C13 177.8(2) . . . . ? 
C12 C13 C14 C9 -0.1(4) . . . . ? 
C7 C8 C15 C20 -58.3(2) . . . . ? 
C9 C8 C15 C20 121.71(15) . . . . ? 
C7 C8 C15 C16 124.33(17) . . . . ? 
C9 C8 C15 C16 -55.68(19) . . . . ? 
C20 C15 C16 C17 2.7(3) . . . . ? 
C8 C15 C16 C17 -179.86(17) . . . . ? 
C15 C16 C17 C18 -2.0(3) . . . . ? 
C16 C17 C18 C19 0.0(3) . . . . ? 
C17 C18 C19 C20 1.1(3) . . . . ? 
C18 C19 C20 C15 -0.3(3) . . . . ? 
C16 C15 C20 C19 -1.5(3) . . . . ? 
C8 C15 C20 C19 -178.99(16) . . . . ? 
C8 C7 C21 C26 -42.19(19) . . . . ? 
C6 C7 C21 C26 138.49(13) . . . . ? 
C8 C7 C21 C22 138.40(15) . . . . ? 
C6 C7 C21 C22 -40.93(18) . . . . ? 
C26 C21 C22 C23 3.9(2) . . . . ? 
C7 C21 C22 C23 -176.68(13) . . . . ? 
C21 C22 C23 C24 -0.8(2) . . . . ? 
C22 C23 C24 C25 -2.5(2) . . . . ? 
C22 C23 C24 C27 178.89(13) . . . . ? 
C23 C24 C25 C26 2.7(2) . . . . ? 
C27 C24 C25 C26 -178.73(12) . . . . ? 
C24 C25 C26 C21 0.4(2) . . . . ? 
C22 C21 C26 C25 -3.7(2) . . . . ? 
C7 C21 C26 C25 176.87(12) . . . . ? 
C25 C24 C27 N1 -138.27(14) . . . . ? 
C23 C24 C27 N1 40.33(19) . . . . ? 
C25 C24 C27 N2 43.62(18) . . . . ? 
C23 C24 C27 N2 -137.79(14) . . . . ? 
C33 C28 C29 C30 1.5(3) . . . . ? 
N2 C28 C29 C30 -176.43(16) . . . . ? 
C28 C29 C30 C31 -0.6(3) . . . . ? 
C29 C30 C31 C32 -0.2(4) . . . . ? 
C30 C31 C32 C33 0.1(3) . . . . ? 
C29 C28 C33 C32 -1.6(2) . . . . ? 
N2 C28 C33 C32 176.35(13) . . . . ? 
C31 C32 C33 C28 0.7(3) . . . . ? 
N2 C34 C35 N1 -1.17(14) . . . . ? 
C40 C34 C35 N1 176.61(11) 2_646 . . . ? 
N2 C34 C35 C36 178.04(11) . . . . ? 
C40 C34 C35 C36 -4.18(19) 2_646 . . . ? 
C34 C35 C36 C37 -176.54(12) . . . . ? 
N1 C35 C36 C37 2.5(2) . . . . ? 
C34 C35 C36 C41 2.33(18) . . . . ? 
N1 C35 C36 C41 -178.58(11) . . . . ? 
C41 C36 C37 C38 -0.5(2) . . . . ? 
C35 C36 C37 C38 178.28(13) . . . . ? 
C36 C37 C38 C39 1.5(2) . . . . ? 
C37 C38 C39 C40 -0.3(2) . . . . ? 
C38 C39 C40 C41 -1.87(19) . . . . ? 
C38 C39 C40 C34 179.45(13) . . . 2_646 ? 
C37 C36 C41 C40 -1.56(18) . . . . ? 
C35 C36 C41 C40 179.56(11) . . . . ? 
C37 C36 C41 C41 178.73(14) . . . 2_646 ? 
C35 C36 C41 C41 -0.1(2) . . . 2_646 ? 
C39 C40 C41 C36 2.74(17) . . . . ? 
C34 C40 C41 C36 -178.46(11) 2_646 . . . ? 
C39 C40 C41 C41 -177.56(14) . . . 2_646 ? 
C34 C40 C41 C41 1.2(2) 2_646 . . 2_646 ? 
N2 C27 N1 C35 -0.16(14) . . . . ? 
C24 C27 N1 C35 -178.46(12) . . . . ? 
C34 C35 N1 C27 0.84(14) . . . . ? 
C36 C35 N1 C27 -178.32(12) . . . . ? 
N1 C27 N2 C34 -0.54(14) . . . . ? 
C24 C27 N2 C34 177.78(11) . . . . ? 
N1 C27 N2 C28 177.63(12) . . . . ? 
C24 C27 N2 C28 -4.0(2) . . . . ? 
C35 C34 N2 C27 1.00(13) . . . . ? 
C40 C34 N2 C27 -176.52(13) 2_646 . . . ? 
C35 C34 N2 C28 -177.12(13) . . . . ? 
C40 C34 N2 C28 5.4(2) 2_646 . . . ? 
C29 C28 N2 C27 80.04(18) . . . . ? 
C33 C28 N2 C27 -97.95(16) . . . . ? 
C29 C28 N2 C34 -102.18(16) . . . . ? 
C33 C28 N2 C34 79.83(17) . . . . ? 
 
_diffrn_measured_fraction_theta_max    0.986 
_diffrn_reflns_theta_full              28.80 
_diffrn_measured_fraction_theta_full   0.986 
_refine_diff_density_max    0.292 
_refine_diff_density_min   -0.248 
_refine_diff_density_rms    0.038 
